# Supplementary material for: Two wheel-like polytungstates obtained by incorporation of two {Cu4} clusters and two molybdenum centers in the {W48} wheel
Source: Royal Society of Chemistry journal article supplement (doi:10.1039/c2dt30742a), 2012-01-01
Supplement: c2dt30742a.pdf [file c2dt30742a.pdf]

## Supporting Information

### Two Wheel-Like Polytungstates Obtained by Incorporation of Two {Cu<sub>4</sub>} Clusters and Two Molybdenum Centers in the {W<sub>48</sub>} Wheel

Zhu-Jun Liu,<sup>a</sup> Zhi-Ming Zhang,<sup>a,\*</sup> Hai Fu,<sup>a</sup> Yang-Guang Li,<sup>a</sup> Wei-Lin Chen,<sup>a</sup> Hai-Hong Wu,<sup>a</sup> and  
En-Bo Wang<sup>a,\*</sup>

*<sup>a</sup>Key laboratory of Polyoxometalate Science of Ministry of Education, Department of Chemistry,  
Northeast Normal University, Renmin Street No.5268, Changchun, Jilin, 130024, P. R. China.*

E-mail: *zhangzm128@nenu.edu.cn (Z. M. Zhang), wangeb889@nenu.edu.cn (E. B. Wang).*

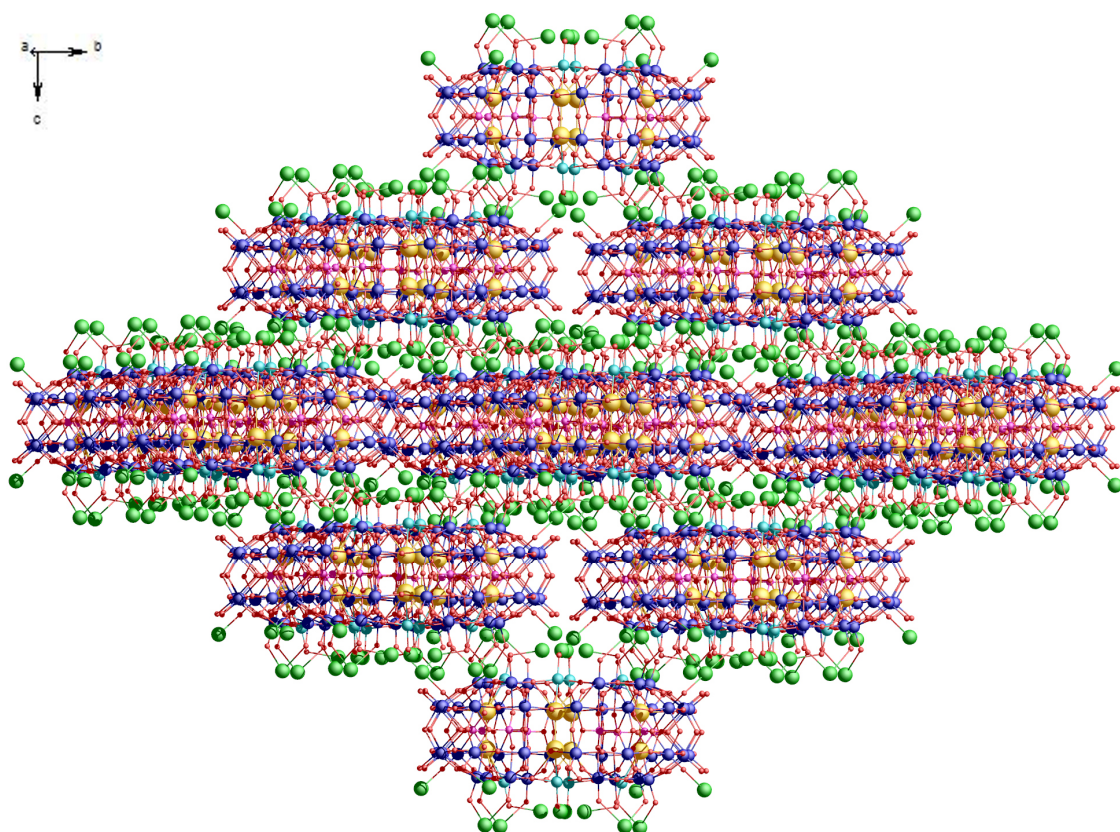

**Fig. S1.** The 3D supramolecular framework in **2**, Color codes: K, Na, W, Mo, P and O, yellow, bright green, blue, turquoise, pink and red spheres, respectively.

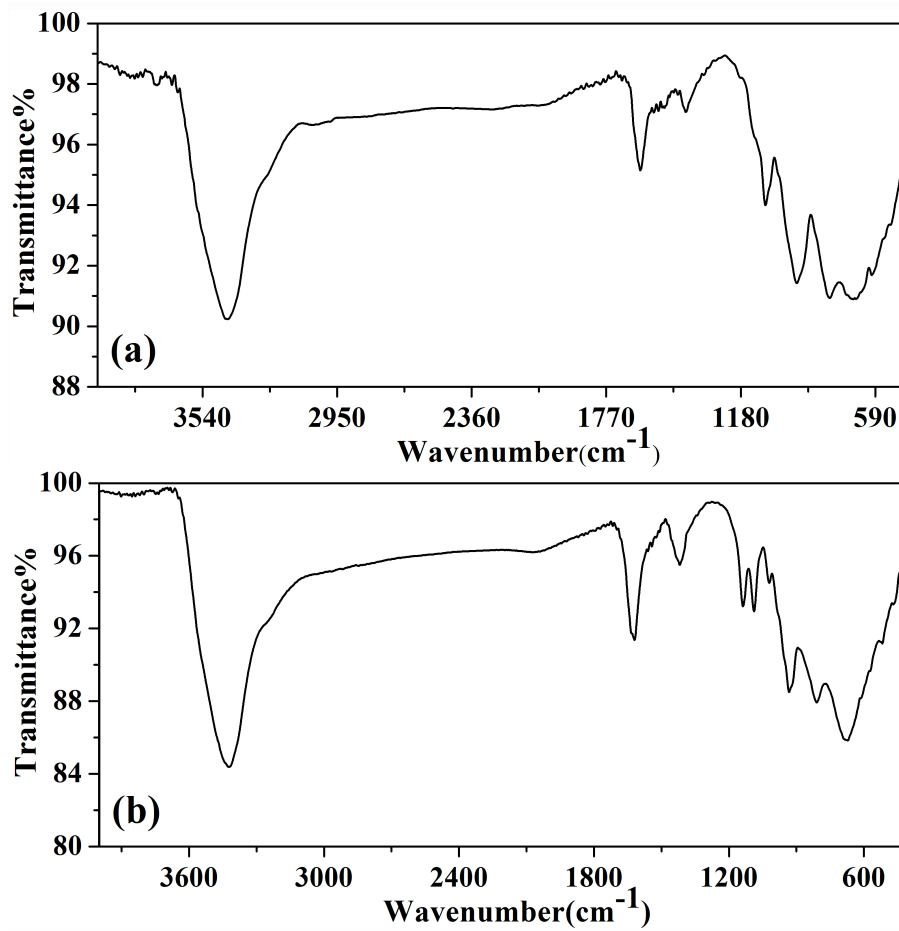

**Fig. S2.** (a) FT-IR spectrum of **1**; (b) FT-IR spectrum of **2**.

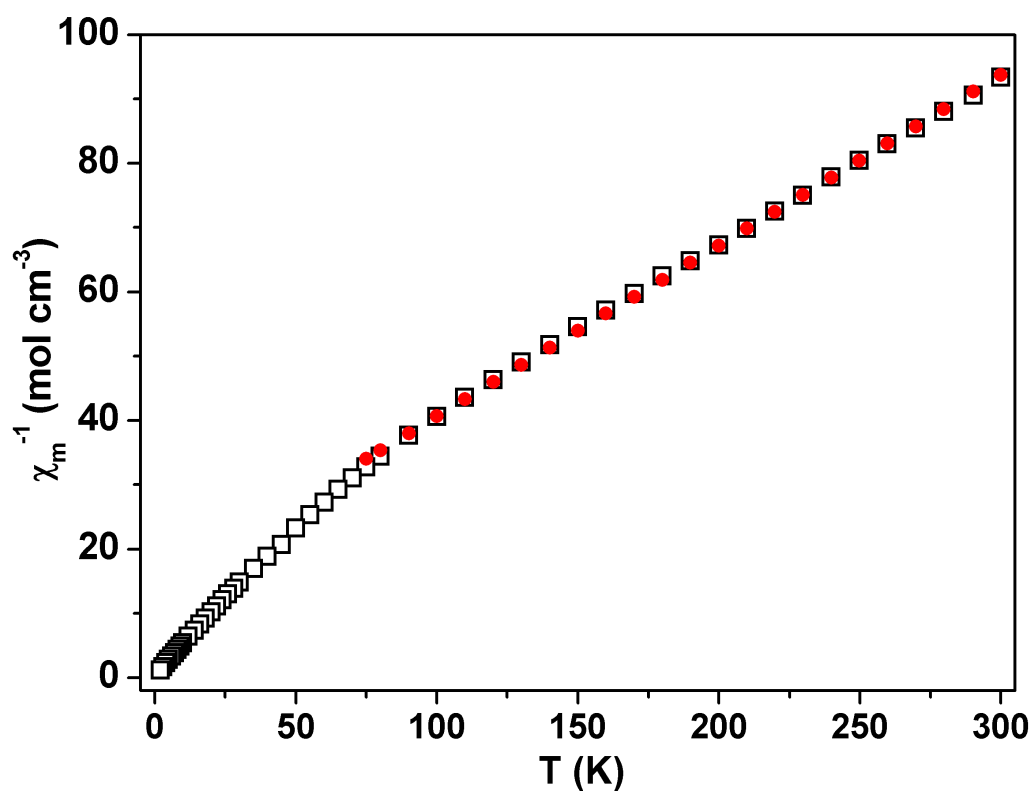

Fig. S3. The red line is the best fit with the Curie-Weiss law.

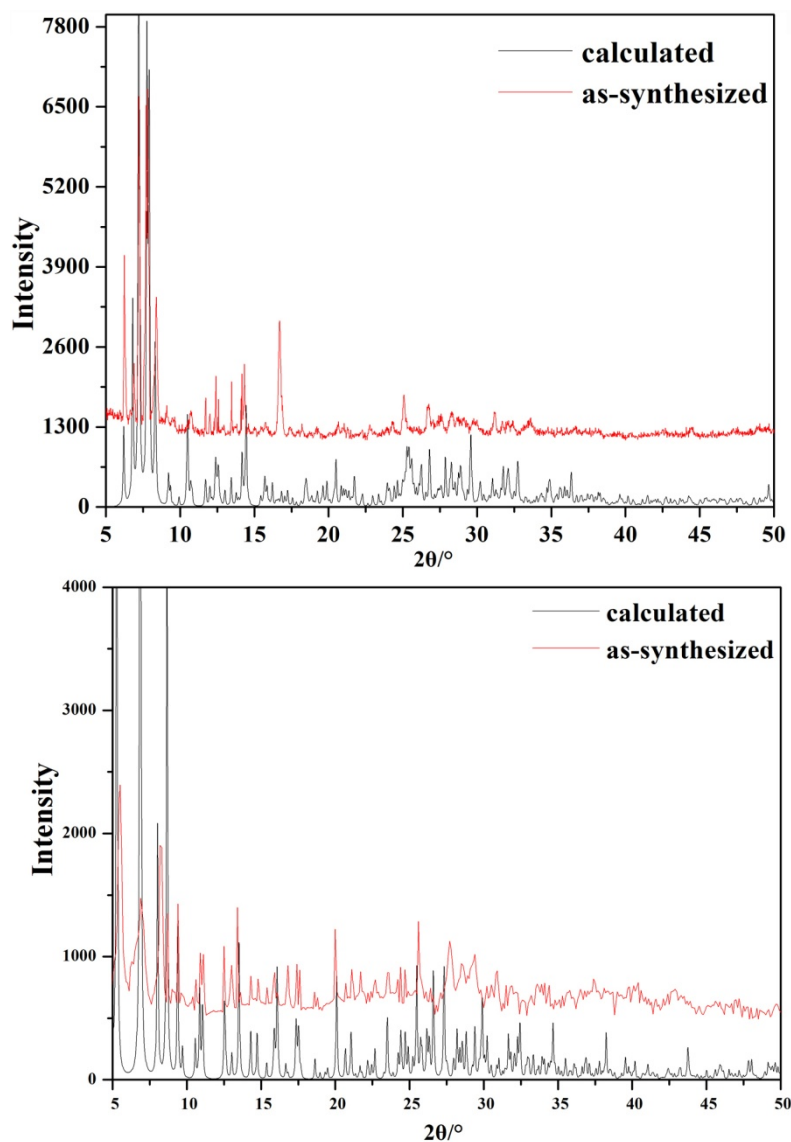

**Fig. S4.** XPRD patterns of **1** and **2**. Top: **1**, Bottom: **2**. The X-ray powder diffraction pattern of the as-synthesized is almost identical to the calculated pattern from single-crystal diffraction data, indicating the purity of the product.

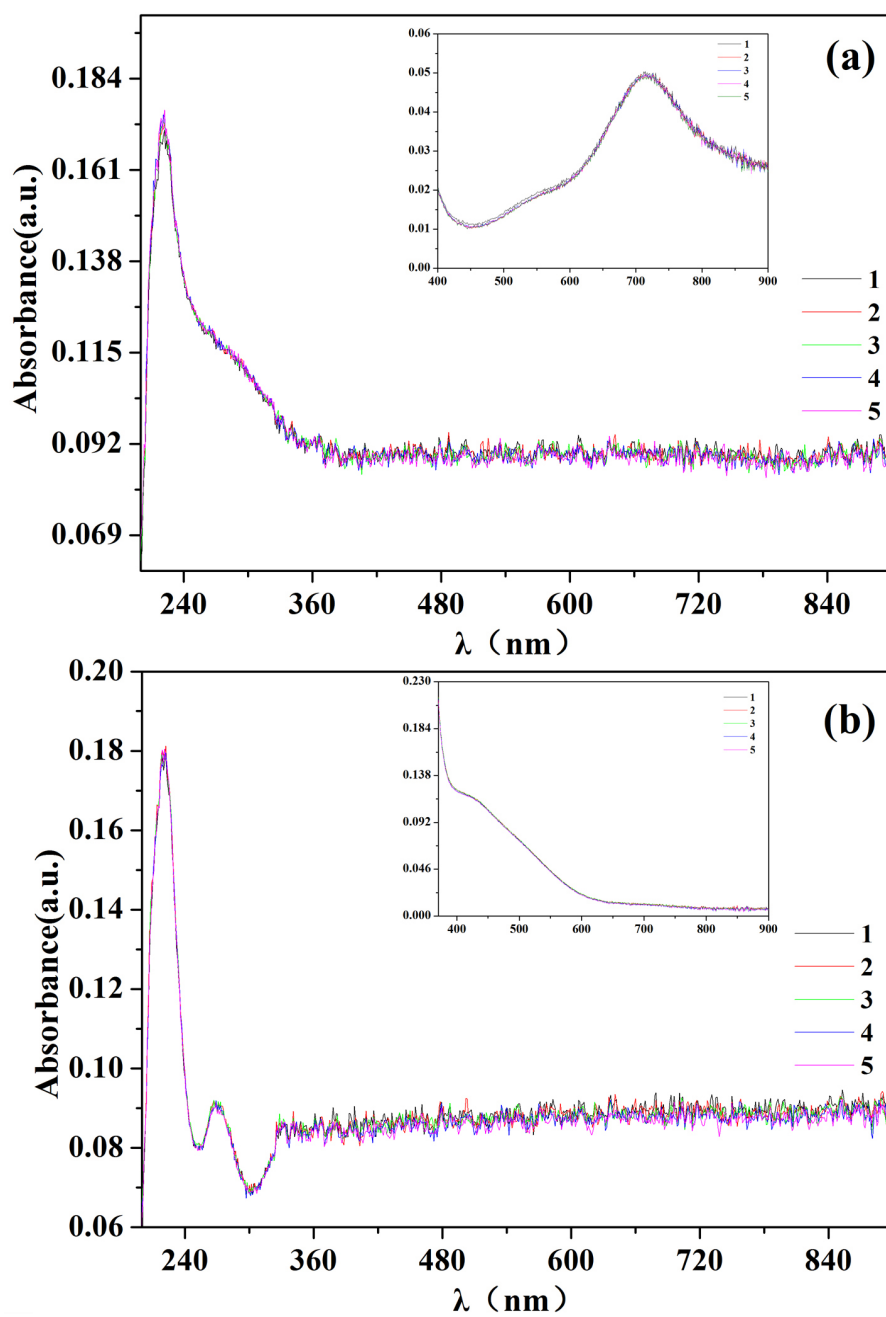

Fig. S5. (a) UV-vis spectrum of **1**; (b) UV-vis spectrum of **2**.

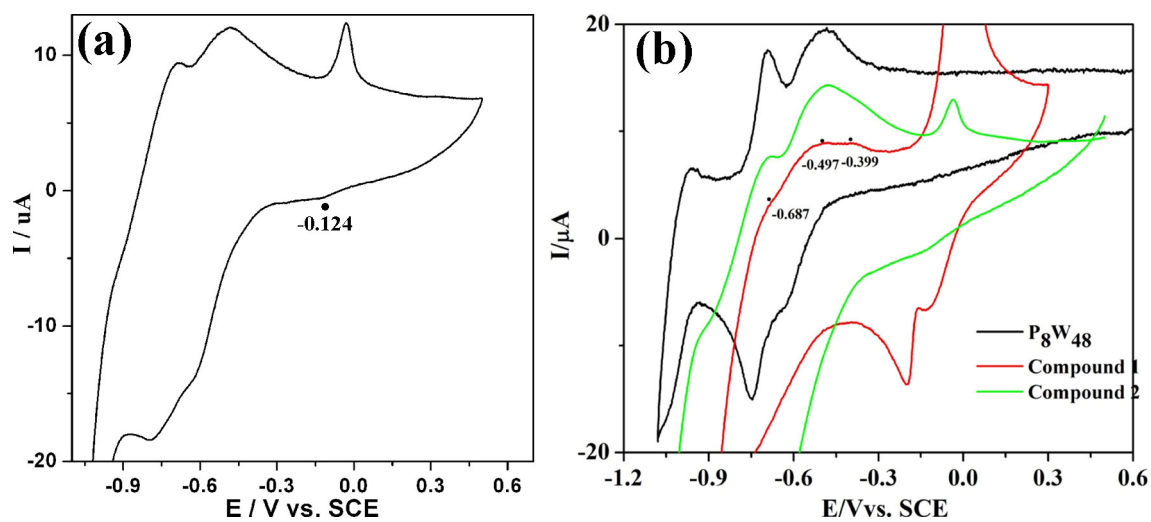

**Fig. S6.** (a) CV of *t* 2 with the same concentration of  $2.5 \times 10^{-4}$  M in a pH 4 buffer solution at the scan rate of 10 mV/s; (b) CV of the  $\text{P}_8\text{W}_{48}$ , **1** and **2** in a pH 4 buffer solution at the scan rate of 100mV/s.

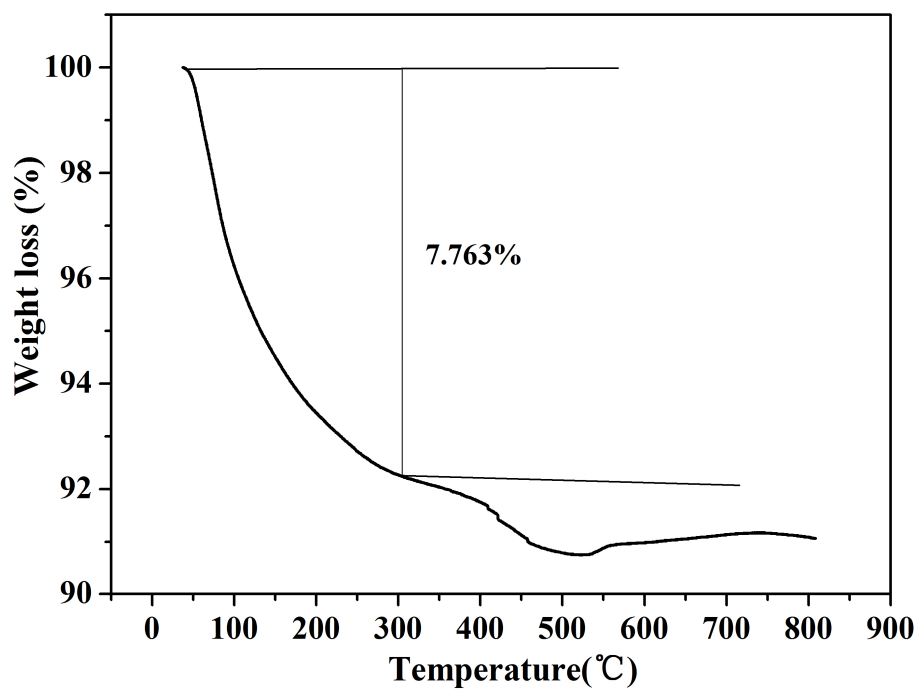

**Fig. S7.** TG curve of **2**. The TG curve of **2** shows a total weight loss of 7.763% in the temperature range of 20 - 300°, which corresponds to the loss of the lattice water molecules in **2**.



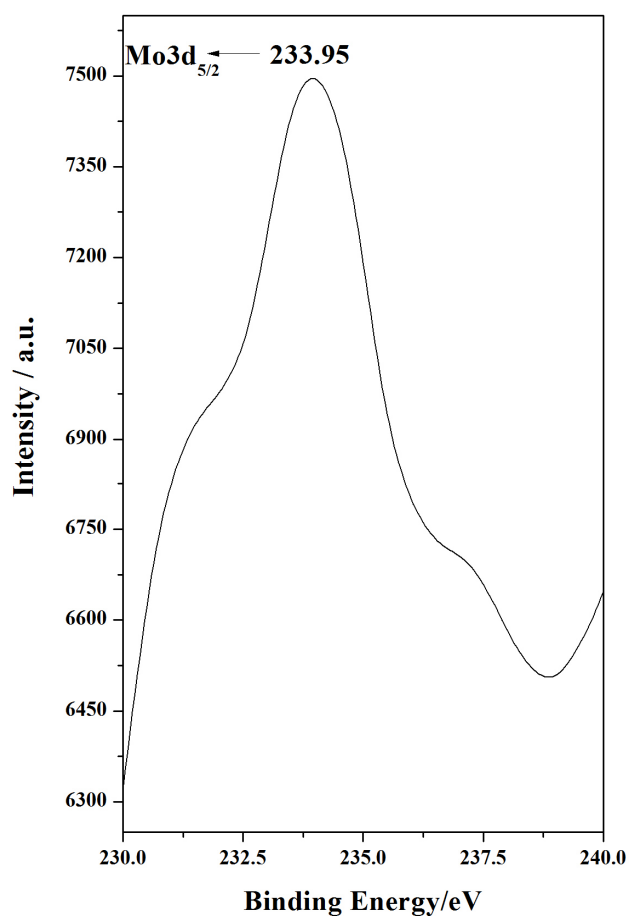

**Fig. S8.** (a) XPS spectrum of Mo(V) of compound **2**.

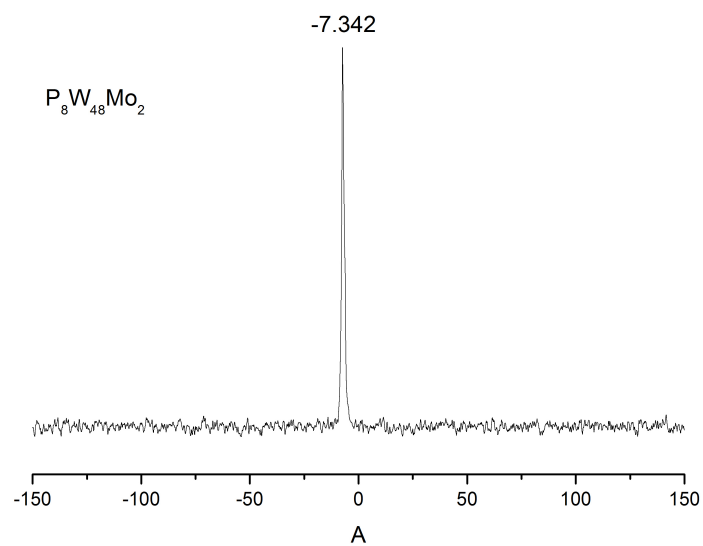

**Fig. S9.**  $^{31}\text{P}$  MAS-NMR Spectrum of **2**.
